# Supplementary material
Source: ML conference proceedings conference paper supplement (https://aclanthology.org/2021.naacl-demos.12)
Supplement: Supplementary [file 2021.naacl-demos.12.Supplementary.pdf]

## A Supplemental Material

The following supplemental material features various screenshots of ACTIVEANNO in order to display the scope of the project.

### A.1 Home Page



Figure 4: Home page

Figure 4 shows the home page of ACTIVEANNO, including navigation options to all subareas as well as the language switcher.

### A.2 Manage UI



Figure 5: Editing an annotation definition

The manage UI has various parts, such as the ability to edit annotation definitions as depicted in Figure 5, here a number annotation. Another part is creating and editing annotation projects. Figure 6 shows the basic properties of an annotation project, like name, description and user associated to their roles. Figure 7 shows the annotation schema, which is comprised of all the annotation definitions of the project. Finally, Figure 8 shows part of the analysis UI where annotation results can be statistically evaluated. It features graphs of annotation duration, inter-annotator agreement, and accuracy. Not depicted are the filter options to only analyze a subset of all annotation results of the project, for example, based on the annotators or time, and an extensive table showing statistics (agreement, correctness of annotation) for every document analyzed.

### A.3 Curation UI

The curation UI, as shown in Figure 9, is an extension of the annotation UI, featuring an additional



Figure 6: Editing project basic properties



Figure 7: Editing project annotation schema

panel where all annotation results for the document are displayed. The curator can either accept one of those results as correct, copy the result into the annotation area below, or annotate the document themselves in said annotation area.



Figure 8: Analysis UI with duration, inter-annotator agreement and accuracy



Figure 9: Curation UI
